# Supplementary material for: Solid-Phase Synthesis and In-Silico Analysis of Iron-Binding Catecholato Chelators
Source: Int J Mol Sci. 2020 Oct 12;21(20):7498. doi: 10.3390/ijms21207498 (PMC7593911; doi:10.3390/ijms21207498)
Supplement: Supplementary file 1 [file ijms-21-07498-s001.docx]

**Supplementary material for**

**Solid-phase synthesis and *in silico*analysis of iron-binding catecholato chelators**

Ranko Gacesa 1,2, Andrea A.P. Tripodi 1, Agostino Cilibrizzi 1, Antonella Leggio 3, Robert Hider 1, Vincenzo Abbate 4*

Affiliations

1 Institute Pharmaceutical Science, King’s College London

2 University of Groningen and University Medical Center Groningen, Department of Gastroenterology and Department of Genetics, Groningen, the Netherlands

3 Department of Pharmacy, Health and Nutritional Sciences, University of Calabria, Rende, Italy

4 Department of Analytical, Environmental and Forensic Sciences, King’s College London, London, UK

*  [vincenzo.abbate@kcl.ac.uk](mailto:vincenzo.abbate@kcl.ac.uk); Tel: +44-20-7848-84489

S1 A

S1 D

**Figure S1:** Structures and elemental compositions of tricatecholate-based peptide **1** and its protonated form (A); HPLC-DAD/254nm (B), low res ESI+ MS (C) and ESI+ HRMS (D) (calculated m/z for [M+H]+ = 684.2260; found = 684.2272).

S2 A


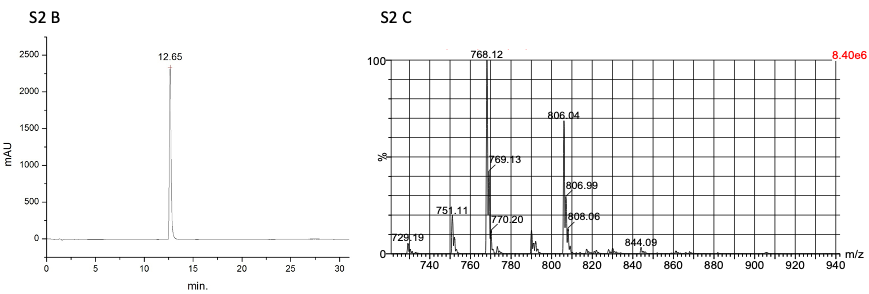


S2 D

**Figure S2:** Structures and elemental compositions of tricatecholate-based peptide **2** and its protonated form (A); HPLC-DAD/254nm (B), low res ESI+ MS (C) and ESI+ HRMS (D) (calculated m/z for [M+H]+ = 768.3199; found = 768.3211).

S3 A

**Figure S3:** Structures and elemental compositions of tricatecholate-based peptide **3** and its protonated form (A); HPLC-DAD/254nm (B), low res ESI+ MS (C) and ESI+ HRMS (D) (calculated m/z for [M+H] + = 810.3668; found = 810.3691).


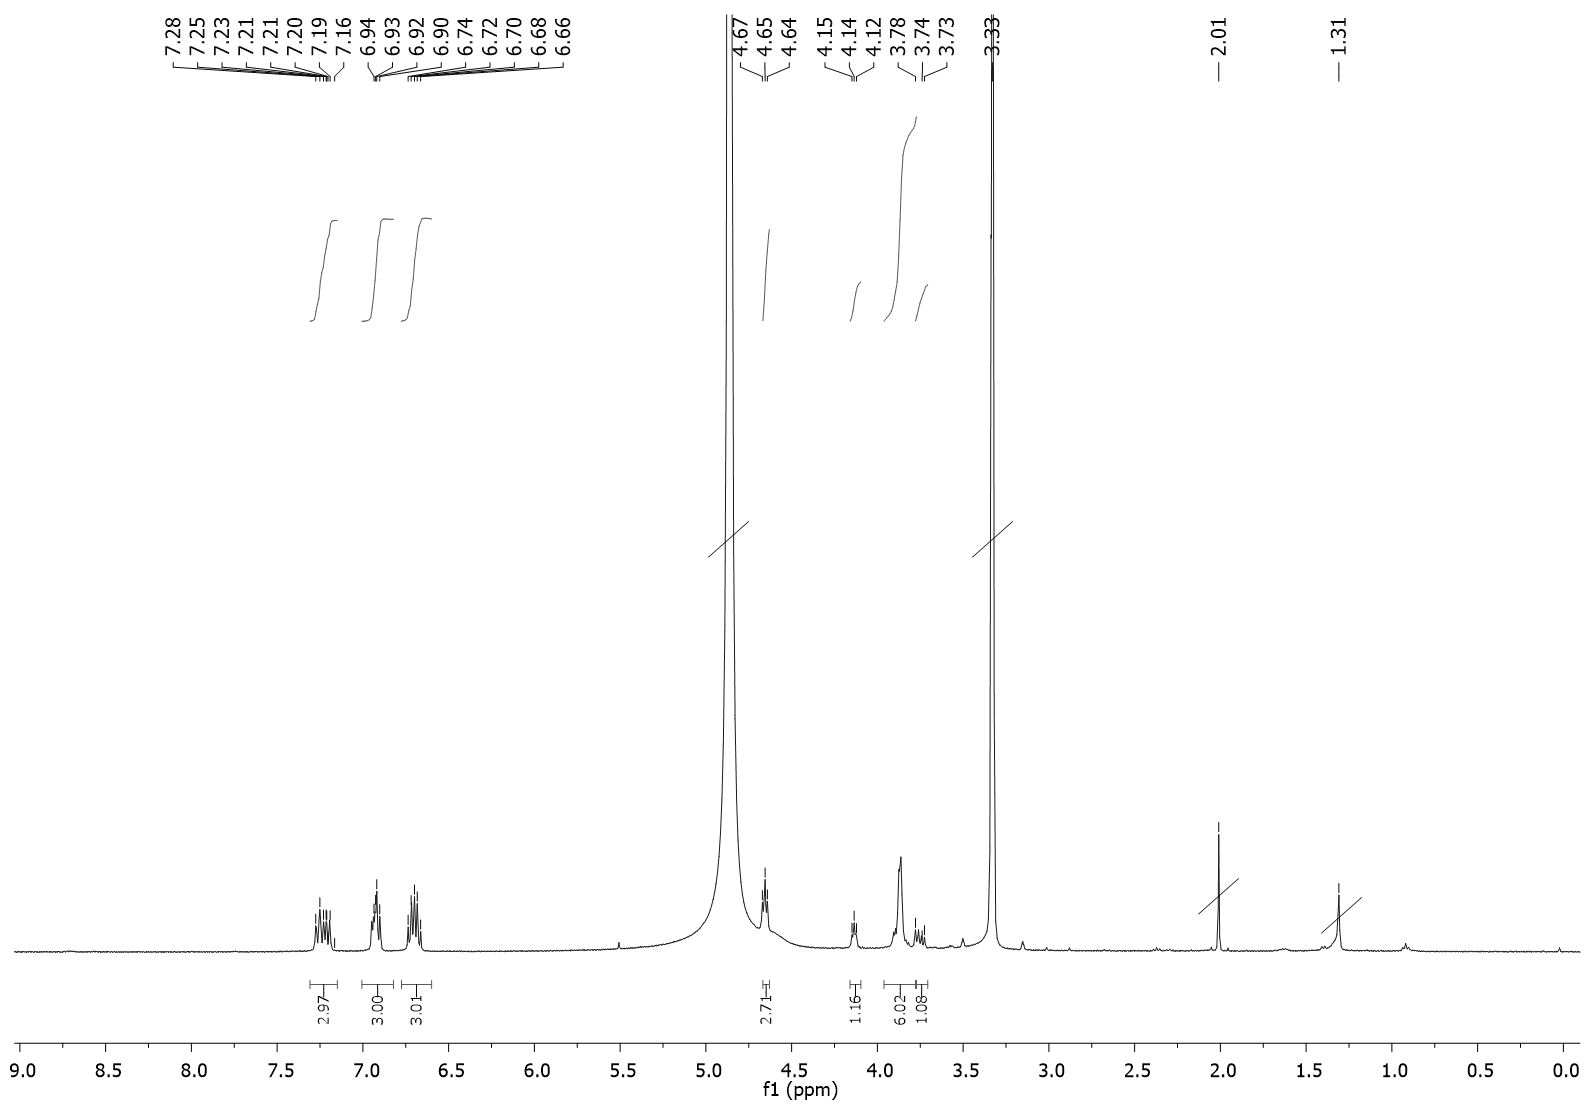


**Figure S4:** 1H NMR of tricatecholate-based peptide **1** (in CD3OD+D2O).

**
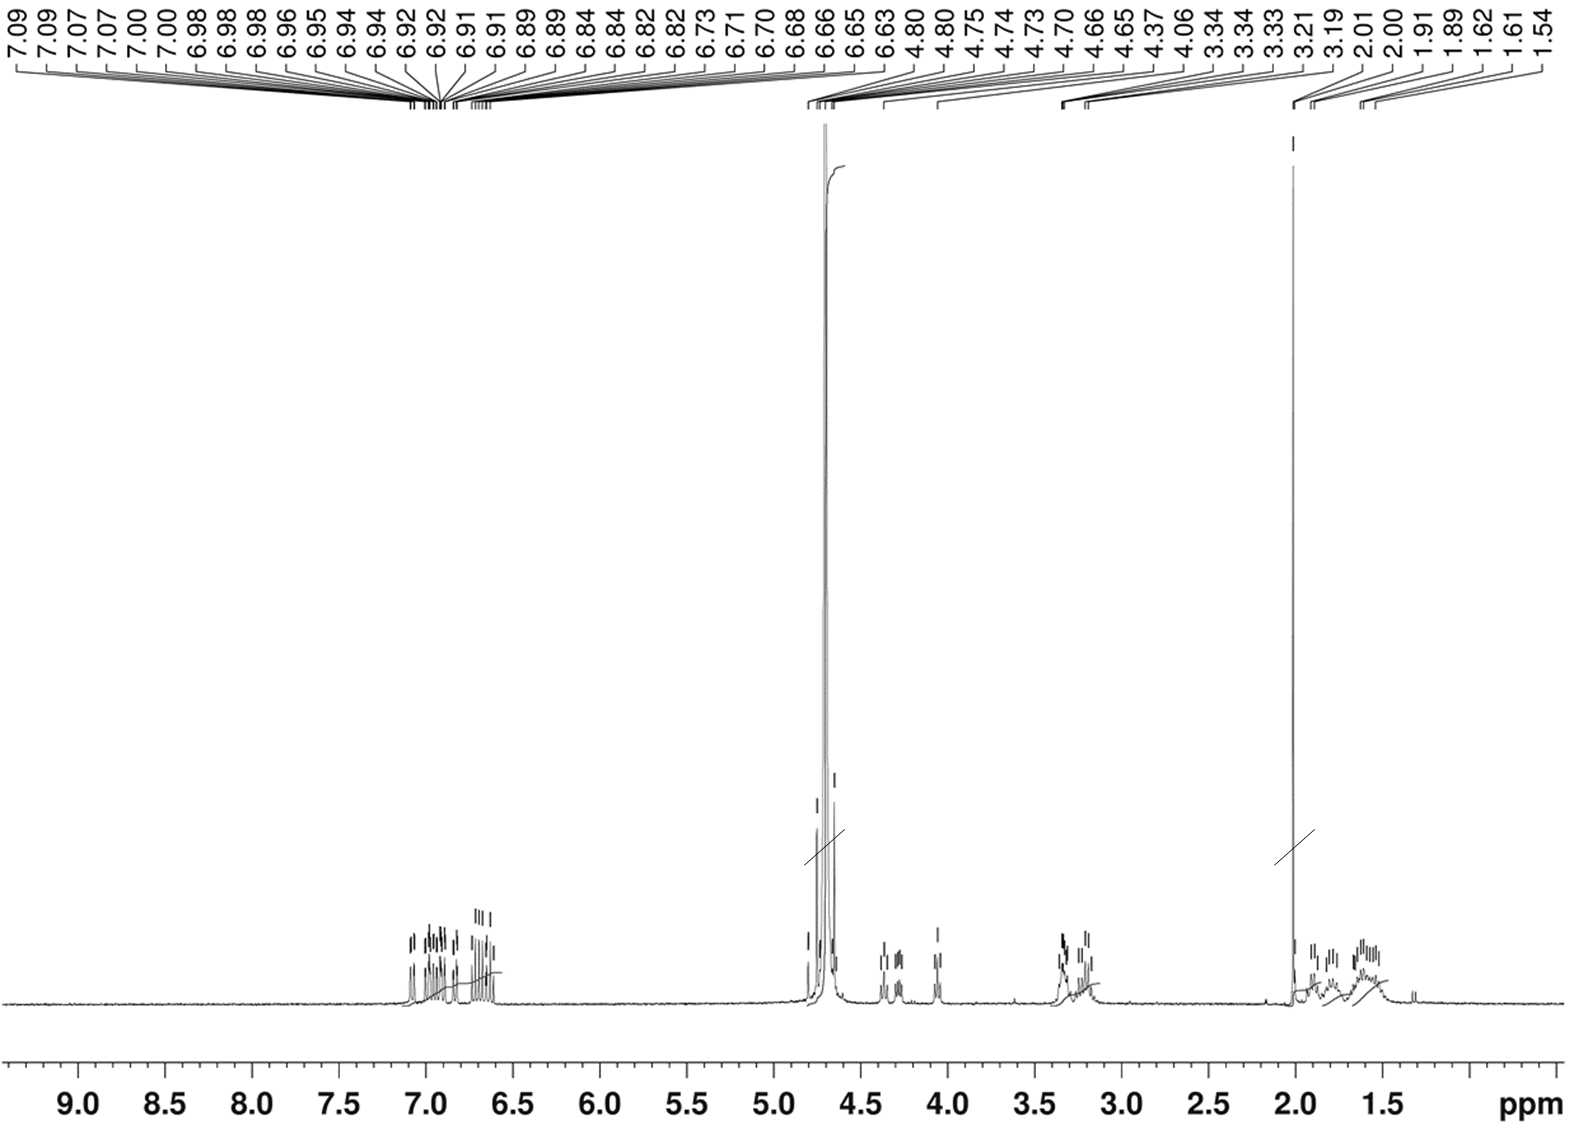
**

**Figure S5:** 1H NMR of tricatecholate-based peptide **2** (in D2O).


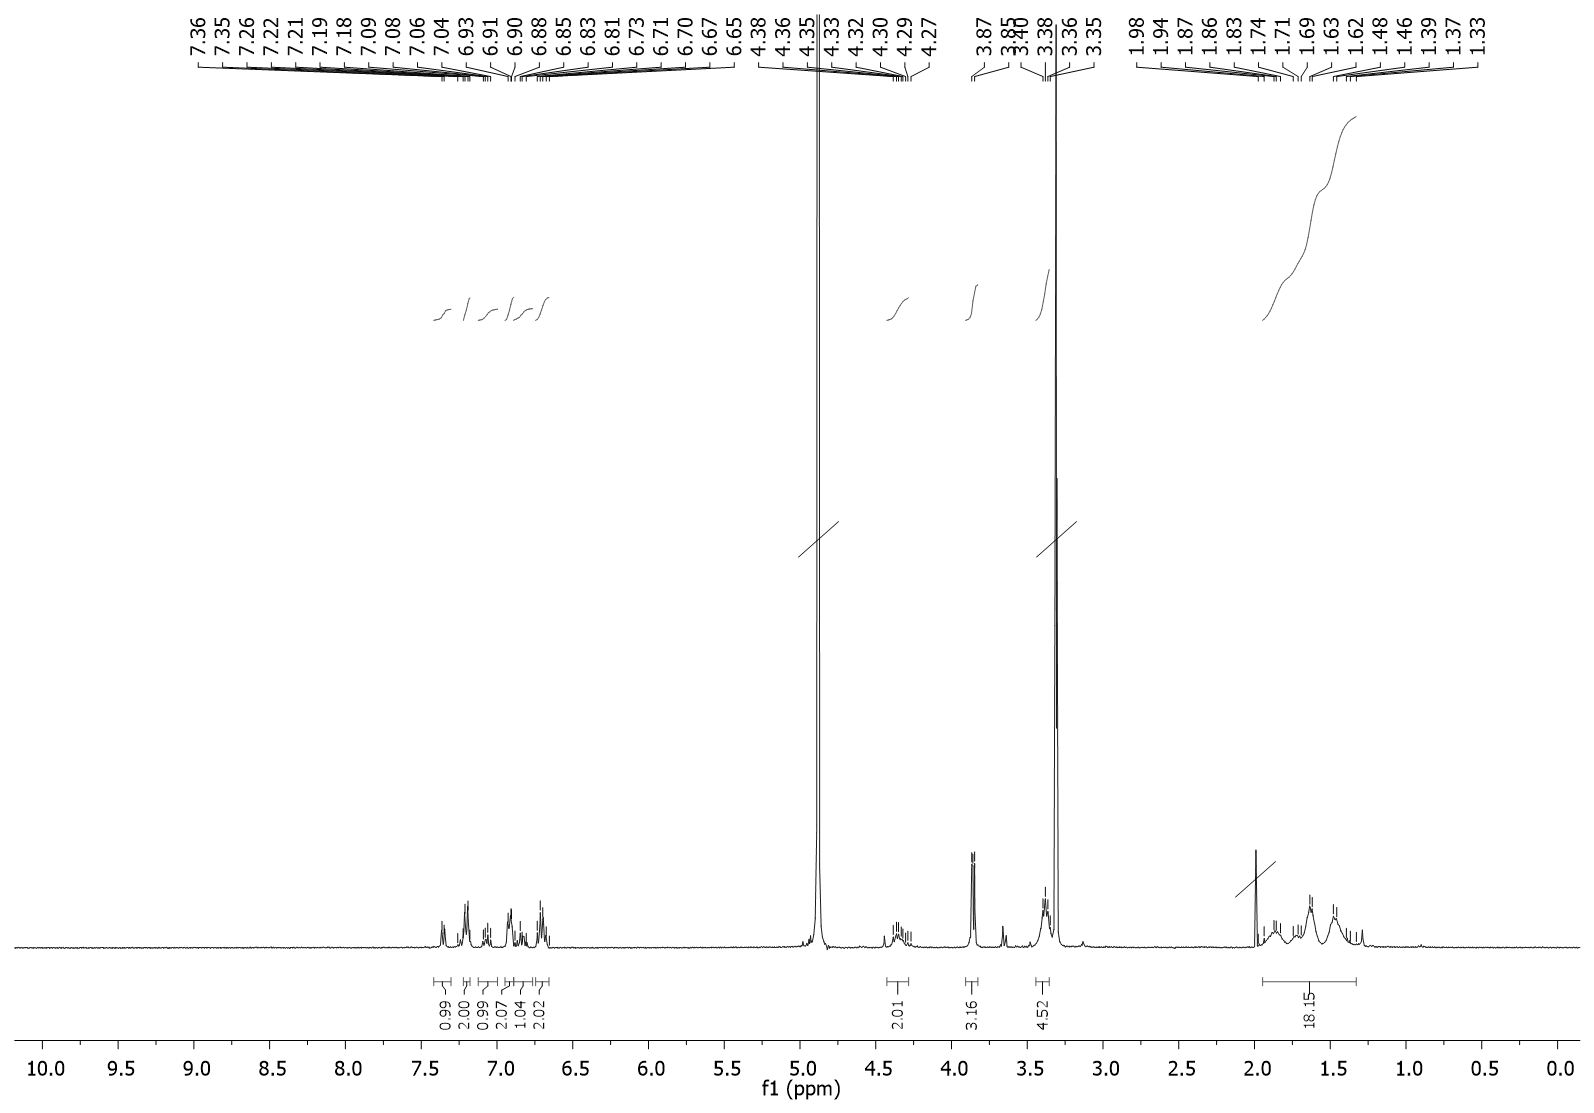


**Figure S6:** 1H NMR of tricatecholate-based peptide **3** (in CD3OD+D2O).
